# Supplementary material for: Molecular characterisation of the emerging measles virus from Roraima state, Brazil, 2018
Source: PubMed Central journal article supplement (PMC6423661; doi:10.1590/0074-02760180545), 2019-03-18
Supplement: 1678-8060-mioc-114-e180545-s.pdf [file 1678-8060-mioc-114-e180545-s.pdf]

TABLE  
Primers designed to amplify and sequence the entire genome of measles genotype D8

| Primer name      | Sequence                     | Pool | Length | Tm    | GC%   | Start | End  |
|------------------|------------------------------|------|--------|-------|-------|-------|------|
| FN_MVD8_1_LEFT   | TGGCCACACTTTTAAGGAGCTT       | 1    | 22     | 60.42 | 45.45 | 1     | 23   |
| FN_MVD8_1_RIGHT  | AATCCCTCAGGGTCTTGCACTT       | 1    | 22     | 61.64 | 50.00 | 488   | 466  |
| FN_MVD8_2_LEFT   | TCAAGAGGTACCAACATGGAGGA      | 2    | 23     | 60.76 | 47.83 | 351   | 374  |
| FN_MVD8_2_RIGHT  | TTCGGCAATCCTAGGTTTGTTC       | 2    | 23     | 61.12 | 47.83 | 756   | 733  |
| FN_MVD8_3_LEFT   | GGAGAGAAAATGGTTGGATGTGGT     | 1    | 24     | 61.05 | 45.83 | 632   | 656  |
| FN_MVD8_3_RIGHT  | ATCGACCAAAGTTCAAACCC         | 1    | 22     | 61.08 | 50.00 | 1063  | 1041 |
| FN_MVD8_4_LEFT   | TGCACCCTATATGGTAATCCTGGAG    | 2    | 25     | 61.52 | 48.00 | 926   | 951  |
| FN_MVD8_4_RIGHT  | ACTTAATCTGCTGGACCCGGT        | 2    | 22     | 61.69 | 50.00 | 1380  | 1358 |
| FN_MVD8_5_LEFT   | TTCTACACGGTGATCAAAGTGAGAA    | 1    | 25     | 60.22 | 40.00 | 1255  | 1280 |
| FN_MVD8_5_RIGHT  | GCTGTGTGGACCTGGTTCCTAA       | 1    | 22     | 62.20 | 54.55 | 1660  | 1638 |
| FN_MVD8_6_LEFT   | AAAGTTCAGACACGGACCC          | 2    | 22     | 62.70 | 54.55 | 1522  | 1544 |
| FN_MVD8_6_RIGHT  | TCGTCATCGCTCTCTCCAGATC       | 2    | 22     | 61.38 | 54.55 | 1965  | 1943 |
| FN_MVD8_7_LEFT   | ATCAGACAACCCAGGACAGGAC       | 1    | 22     | 61.68 | 54.55 | 1815  | 1837 |
| FN_MVD8_7_RIGHT  | CAGAAGCCCTGAACCCATAGA        | 1    | 22     | 61.49 | 54.55 | 2240  | 2218 |
| FN_MVD8_8_LEFT   | TCAGGCCTTGATGGTGATAGCA       | 2    | 22     | 61.49 | 50.00 | 2095  | 2117 |
| FN_MVD8_8_RIGHT  | TACCAGATTCGGGTGTCCACTC       | 2    | 22     | 61.47 | 54.55 | 2570  | 2548 |
| FN_MVD8_9_LEFT   | TGCAACCCAATGTGCTCGAAAG       | 1    | 22     | 62.22 | 50.00 | 2448  | 2470 |
| FN_MVD8_9_RIGHT  | CGGGATTGAGTTCGACATCTGC       | 1    | 22     | 61.62 | 54.55 | 2876  | 2854 |
| FN_MVD8_10_LEFT  | GCAGATCAACAAGCAAAATATCAGCA   | 2    | 26     | 61.12 | 38.46 | 2751  | 2777 |
| FN_MVD8_10_RIGHT | GGCGAGATCGTTAGTTCCTTTG       | 2    | 22     | 61.37 | 54.55 | 3184  | 3162 |
| FN_MVD8_11_LEFT  | AAAAAGATGAGCTCAGCCGTCG       | 1    | 22     | 61.50 | 50.00 | 3028  | 3050 |
| FN_MVD8_11_RIGHT | AACAACCCCGAGCAGAAACATG       | 1    | 22     | 61.61 | 50.00 | 3507  | 3485 |
| FN_MVD8_12_LEFT  | CAAAGGGTCGATCGTCCGATA        | 2    | 22     | 62.21 | 54.55 | 3371  | 3393 |
| FN_MVD8_12_RIGHT | TAAACAACACGGAACTCTGCG        | 2    | 22     | 61.37 | 50.00 | 3806  | 3784 |
| FN_MVD8_13_LEFT  | ACCCCACTAACTCTCCTCACAC       | 1    | 22     | 61.09 | 54.55 | 3678  | 3700 |
| FN_MVD8_13_RIGHT | AATGTGAAGACTGGTGCCTCCT       | 1    | 22     | 61.63 | 50.00 | 4110  | 4088 |
| FN_MVD8_14_LEFT  | ATGGTCCACATCGGGAACTTCA       | 2    | 22     | 61.69 | 50.00 | 3981  | 4003 |
| FN_MVD8_14_RIGHT | TCTGTGGAGTCTTTTGGAGGGG       | 2    | 22     | 61.62 | 54.55 | 4431  | 4409 |
| FN_MVD8_15_LEFT  | AATGATGACCAAGGACTATTCAAAGTTC | 1    | 28     | 60.12 | 35.71 | 4305  | 4333 |
| FN_MVD8_15_RIGHT | AAGTTTGTTTAGTTTGCCGGGG       | 1    | 23     | 60.43 | 43.48 | 4767  | 4744 |
| FN_MVD8_16_LEFT  | GGAAAGAAACCCCGCAACTG         | 2    | 22     | 61.92 | 54.55 | 4615  | 4637 |
| FN_MVD8_16_RIGHT | TGGTCTGGATTCTGGTTCGGTT       | 2    | 22     | 61.62 | 50.00 | 5049  | 5027 |
| FN_MVD8_17_LEFT  | ATACACACCCGACAGAACCCAG       | 1    | 22     | 61.99 | 54.55 | 4780  | 4802 |
| FN_MVD8_17_RIGHT | TGTGGGATGCTGATGTCGTTT        | 1    | 22     | 61.45 | 50.00 | 5213  | 5191 |
| FN_MVD8_18_LEFT  | CGCAGAAAGGAAAGGCCACAAT       | 2    | 22     | 61.98 | 50.00 | 5085  | 5107 |
| FN_MVD8_18_RIGHT | CTACCCTCGTGCAATTGTTGAG       | 2    | 22     | 61.18 | 54.55 | 5564  | 5542 |
| FN_MVD8_19_LEFT  | GGGGCAATCTCTCTAAGATAGGGG     | 1    | 24     | 61.61 | 54.17 | 5429  | 5453 |
| FN_MVD8_19_RIGHT | TGGACACCCTGAACAGCCAATA       | 1    | 22     | 61.63 | 50.00 | 5886  | 5864 |
| FN_MVD8_20_LEFT  | CGGTATTGCACTTACCAGTCC        | 2    | 22     | 61.51 | 54.55 | 5748  | 5770 |
| FN_MVD8_20_RIGHT | ACGTGAGTTATCCGGGCCTTTA       | 2    | 22     | 61.48 | 50.00 | 6165  | 6143 |
| FN_MVD8_21_LEFT  | TATCCAGGCTTTGAGCTATGCG       | 1    | 22     | 60.55 | 50.00 | 6039  | 6061 |
| FN_MVD8_21_RIGHT | ACGAGTGACGAGCACAAGACT        | 1    | 22     | 61.64 | 50.00 | 6462  | 6440 |
| FN_MVD8_22_LEFT  | AGTCATCGTGCACTTTCATGCC       | 2    | 22     | 61.76 | 50.00 | 6341  | 6363 |
| FN_MVD8_22_RIGHT | TCTGGTCCGATGACTCCAACAA       | 2    | 22     | 61.35 | 50.00 | 6797  | 6775 |
| FN_MVD8_23_LEFT  | ATCCAGACGCTGTGTAATTGCA       | 1    | 22     | 62.24 | 50.00 | 6659  | 6681 |
| FN_MVD8_23_RIGHT | GGGAAGCCGGAGACAATTTTCAG      | 1    | 22     | 61.52 | 54.55 | 7108  | 7086 |
| FN_MVD8_24_LEFT  | TCCTATGTAAGGTCCTCTGATCCT     | 2    | 25     | 60.10 | 44.00 | 6982  | 7007 |
| FN_MVD8_24_RIGHT | ACGTCCTTAACCTGATGCTCGA       | 2    | 22     | 61.46 | 50.00 | 7435  | 7413 |
| FN_MVD8_25_LEFT  | TCTGAGCTTGATCGGGTTGCTA       | 1    | 22     | 61.47 | 50.00 | 7300  | 7322 |
| FN_MVD8_25_RIGHT | TCTGATTGTAGTGGGCCCTGAG       | 1    | 22     | 61.48 | 54.55 | 7748  | 7726 |
| FN_MVD8_26_LEFT  | CAGATGTGGCTGCTGAAGAACT       | 2    | 22     | 60.87 | 50.00 | 7626  | 7648 |

| Primer name      | Sequence                       | Pool | Length | Tm    | GC%   | Start | End   |
|------------------|--------------------------------|------|--------|-------|-------|-------|-------|
| FN_MVD8_26_RIGHT | CCACCATGCAGTTGCTGAAGTC         | 2    | 22     | 62.28 | 54.55 | 8031  | 8009  |
| FN_MVD8_27_LEFT  | TTGTCACAACCTGAGCATGCACC        | 1    | 22     | 61.90 | 50.00 | 7898  | 7920  |
| FN_MVD8_27_RIGHT | GGAAGCATGTCTCCATTTCGCAA        | 1    | 22     | 61.52 | 50.00 | 8310  | 8288  |
| FN_MVD8_28_LEFT  | CCCCCTATCAACGGATGATCCA         | 2    | 22     | 61.36 | 54.55 | 8173  | 8195  |
| FN_MVD8_28_RIGHT | AGTCCTCGCCTGCTTCCTTAAT         | 2    | 22     | 61.48 | 50.00 | 8643  | 8621  |
| FN_MVD8_29_LEFT  | GCTGACTATCCCGCCAATGAAG         | 1    | 22     | 61.38 | 54.55 | 8521  | 8543  |
| FN_MVD8_29_RIGHT | CCACCATCCCAGAGTGAGTGAT         | 1    | 22     | 61.49 | 54.55 | 8964  | 8942  |
| FN_MVD8_30_LEFT  | GTTGCCTATAAAAGGGGTCCCC         | 2    | 22     | 60.69 | 54.55 | 8830  | 8852  |
| FN_MVD8_30_RIGHT | CGGTGCTTGATGTTCTGACACA         | 2    | 22     | 61.38 | 50.00 | 9281  | 9259  |
| FN_MVD8_31_LEFT  | ACCCTGAAGTTCACCTAGATAGCC       | 1    | 24     | 61.42 | 50.00 | 9157  | 9181  |
| FN_MVD8_31_RIGHT | GAAGGGCTCAAACCATTGGGAG         | 1    | 22     | 61.47 | 54.55 | 9621  | 9599  |
| FN_MVD8_32_LEFT  | CAATGCCTGAGGGACACTAAT          | 2    | 22     | 60.03 | 50.00 | 9501  | 9523  |
| FN_MVD8_32_RIGHT | CGAGTGCAGGGAAGAAACCATC         | 2    | 22     | 61.51 | 54.55 | 9943  | 9921  |
| FN_MVD8_33_LEFT  | TGATGTATTGTGATGTCATAGAGGGGA    | 1    | 27     | 61.35 | 40.74 | 9811  | 9838  |
| FN_MVD8_33_RIGHT | ACATTTTCAGCAGCCGTTACCG         | 1    | 22     | 62.01 | 50.00 | 10235 | 10213 |
| FN_MVD8_34_LEFT  | AGGTACTTATCATGATTTAATTGAAGCCCT | 2    | 30     | 61.04 | 33.33 | 10097 | 10127 |
| FN_MVD8_34_RIGHT | ATCCCATCCCTTTGGAGAGCA          | 2    | 22     | 61.44 | 50.00 | 10557 | 10535 |
| FN_MVD8_35_LEFT  | TGAGCAGTGTGTGACAACCTGG         | 1    | 22     | 61.26 | 50.00 | 10424 | 10446 |
| FN_MVD8_35_RIGHT | AGACAGCTAGAGTGTGGAGTGC         | 1    | 22     | 61.72 | 54.55 | 10906 | 10884 |
| FN_MVD8_36_LEFT  | ATGAGGGCATGCCAAGTGATTG         | 2    | 22     | 61.54 | 50.00 | 10782 | 10804 |
| FN_MVD8_36_RIGHT | TCAAGCCTCTTATGCAGCCAC          | 2    | 22     | 61.20 | 50.00 | 11229 | 11207 |
| FN_MVD8_37_LEFT  | CACAACCTGATCTCAAGAAGTACTGCC    | 1    | 26     | 61.77 | 46.15 | 11105 | 11131 |
| FN_MVD8_37_RIGHT | ACTCTAGCAGTTCCCGTTTCT          | 1    | 22     | 61.41 | 50.00 | 11522 | 11500 |
| FN_MVD8_38_LEFT  | GGACCATCAGCACCATTCCCTA         | 2    | 22     | 61.82 | 54.55 | 11365 | 11387 |
| FN_MVD8_38_RIGHT | CGGTCATAACCTCTCTCGATGC         | 2    | 22     | 60.61 | 54.55 | 11780 | 11758 |
| FN_MVD8_39_LEFT  | TGGGCTACTTGTGTCCAATCA          | 1    | 22     | 61.63 | 50.00 | 11642 | 11664 |
| FN_MVD8_39_RIGHT | CCCCCGGTTGTTGTGCATTAC          | 1    | 22     | 61.71 | 54.55 | 12088 | 12066 |
| FN_MVD8_40_LEFT  | AGCAGGCTGTTTGTGAGAAACA         | 2    | 22     | 60.95 | 45.45 | 11961 | 11983 |
| FN_MVD8_40_RIGHT | CCGAATCAGGCCTTTTGTGGTA         | 2    | 22     | 60.88 | 50.00 | 12387 | 12365 |
| FN_MVD8_41_LEFT  | GCATTCCTCATGGACAGGCATA         | 1    | 22     | 60.49 | 50.00 | 12264 | 12286 |
| FN_MVD8_41_RIGHT | GTTGACTGATCCACACTCGCAG         | 1    | 22     | 61.49 | 54.55 | 12684 | 12662 |
| FN_MVD8_42_LEFT  | CATATGTGGGCAAGGCTAGCTC         | 2    | 22     | 61.13 | 54.55 | 12552 | 12574 |
| FN_MVD8_42_RIGHT | GAGTGCTACGATCCCTCAACCT         | 2    | 22     | 61.53 | 54.55 | 13012 | 12990 |
| FN_MVD8_43_LEFT  | GATAGCTCTTGAACGAGGCCT          | 1    | 22     | 61.86 | 54.55 | 12882 | 12904 |
| FN_MVD8_43_RIGHT | TACATAGCTCTGCCCTCAGCTC         | 1    | 22     | 61.34 | 54.55 | 13306 | 13284 |
| FN_MVD8_44_LEFT  | TCGACTCGAGAAAGATACCGGA         | 2    | 22     | 60.42 | 50.00 | 13169 | 13191 |
| FN_MVD8_44_RIGHT | GCTGCACACTGGCCTAAGTAGA         | 2    | 22     | 62.31 | 54.55 | 13601 | 13579 |
| FN_MVD8_45_LEFT  | GGTAACAAAATTTGAGAAGGACCATATGA  | 1    | 29     | 60.34 | 34.48 | 13466 | 13495 |
| FN_MVD8_45_RIGHT | CGGTACTACATCCTCGTCGCTT         | 1    | 22     | 61.88 | 54.55 | 13929 | 13907 |
| FN_MVD8_46_LEFT  | TGCTCAAAATTTGCACACAACCTGT      | 2    | 24     | 60.86 | 37.50 | 13796 | 13820 |
| FN_MVD8_46_RIGHT | AGCGAGGGCGTCAAAAATGAAT         | 2    | 22     | 61.46 | 45.45 | 14214 | 14192 |
| FN_MVD8_47_LEFT  | CGTCAGGGTCTTCGTGGAACAT         | 1    | 22     | 62.55 | 54.55 | 14080 | 14102 |
| FN_MVD8_47_RIGHT | CACCCAAGAACAAGCCGTCTTC         | 1    | 22     | 61.95 | 54.55 | 14491 | 14469 |
| FN_MVD8_48_LEFT  | CGCTAATTATGAAATCCATGCTTTCCG    | 2    | 27     | 61.51 | 40.74 | 14363 | 14390 |
| FN_MVD8_48_RIGHT | GATGGCTGCCAATTCCTCTAGC         | 2    | 22     | 61.39 | 54.55 | 14826 | 14804 |
| FN_MVD8_49_LEFT  | CGTGGGTAGGCAGTATAGATTGC        | 1    | 23     | 60.86 | 52.17 | 14689 | 14712 |
| FN_MVD8_49_RIGHT | GCGTCTCCACAATTGCTTGTA          | 1    | 22     | 61.45 | 50.00 | 15149 | 15127 |
| FN_MVD8_50_LEFT  | AGCTAACCGGCTAATGAACCCT         | 2    | 22     | 61.49 | 50.00 | 15014 | 15036 |
| FN_MVD8_50_RIGHT | CCCAAATTTGCGGGTGATCCT          | 2    | 22     | 61.73 | 50.00 | 15439 | 15417 |
| FN_MVD8_51_LEFT  | TTAACGGACCCAACTGTGCAAA         | 1    | 23     | 61.43 | 43.48 | 15229 | 15252 |
| FN_MVD8_51_RIGHT | AATCAGGGCACTGTATCCGACT         | 1    | 22     | 61.22 | 50.00 | 15669 | 15647 |
| FN_MVD8_5UTR     | ACCAAACAAAGTTGGGTAAGGATAGATC   | -    | 28     | 61.4  | 39.3  | 1     | 28    |
| FN_MVD8_3UTR     | ACCAGACAAAGCTGGGAATAGAAAC      | -    | 25     | 61.3  | 44.0  | 15894 | 15870 |

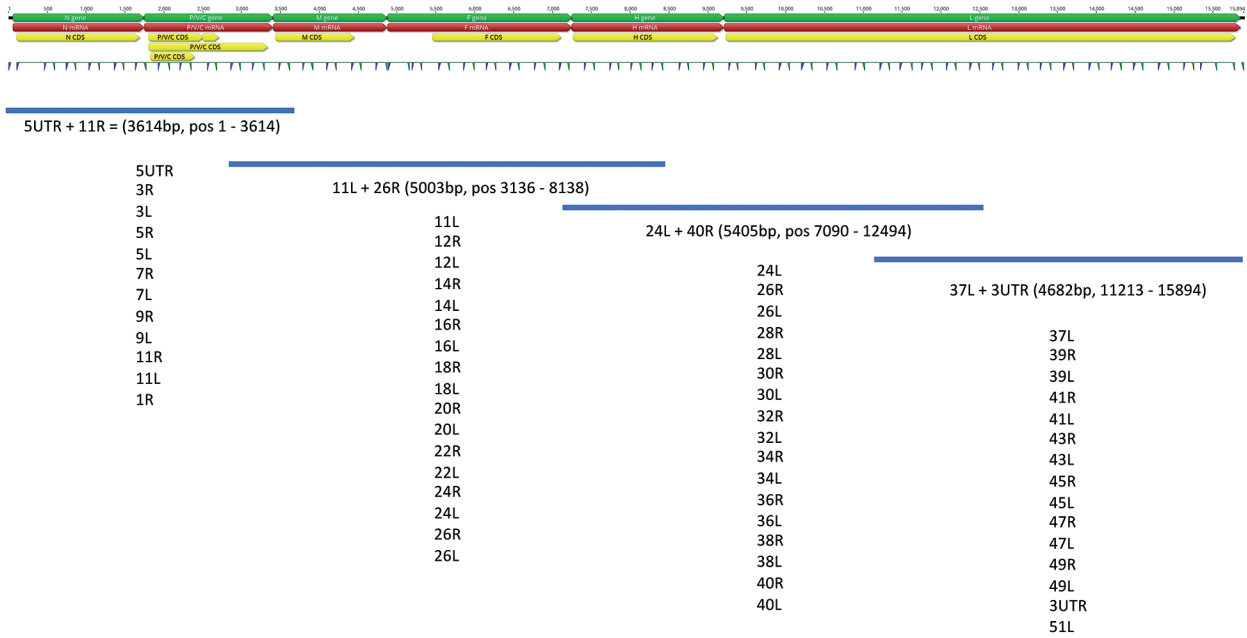

Fig. 1: primers sets used to amplify and sequence the entire measles genome. Four amplicons were generated: amplicon 1 (primers 5'UTR + 11R, 3,614 bp), amplicon 2 (11L + 26R, 5,003 bp), amplicon 3 (24L + 40R, 5,405 bp), and amplicon 4 (37L + 3UTR, 4,682 bp). Each amplicon was sequenced with the primers listed below each scheme.

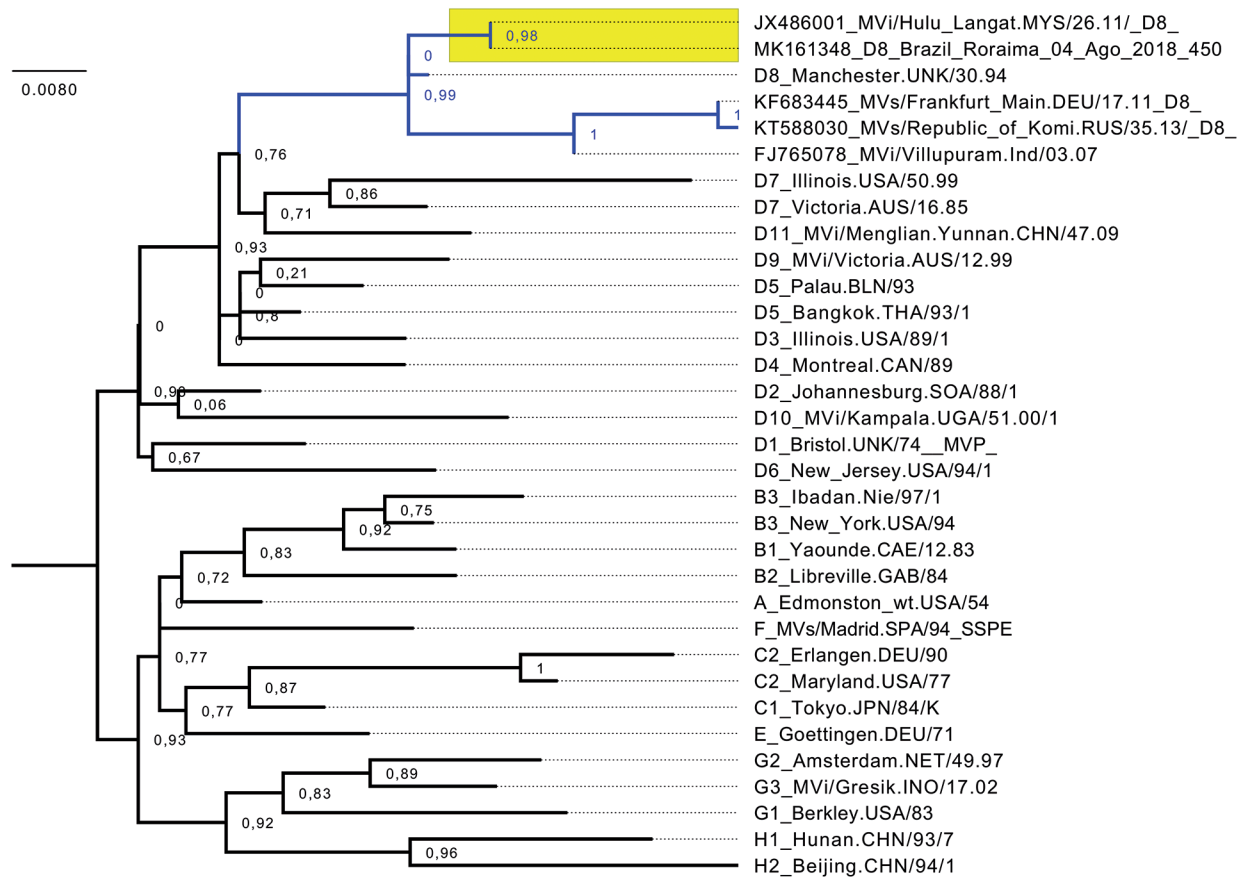

Fig. 2: phylogenetic tree of measles genotypes based on the N gene. A mid-rooted maximum likelihood tree with increasing node order was constructed with the PhyML online server (<http://www.atgc-montpellier.fr/phyml/>). All 24 genotypes and the 4 lineages of genotype D8 are represented. The D8 sequences are grouped in the blue clade, whereas the clade containing the Roraima sample is highlighted in yellow. The scale bar represents nucleotide substitutions per site.

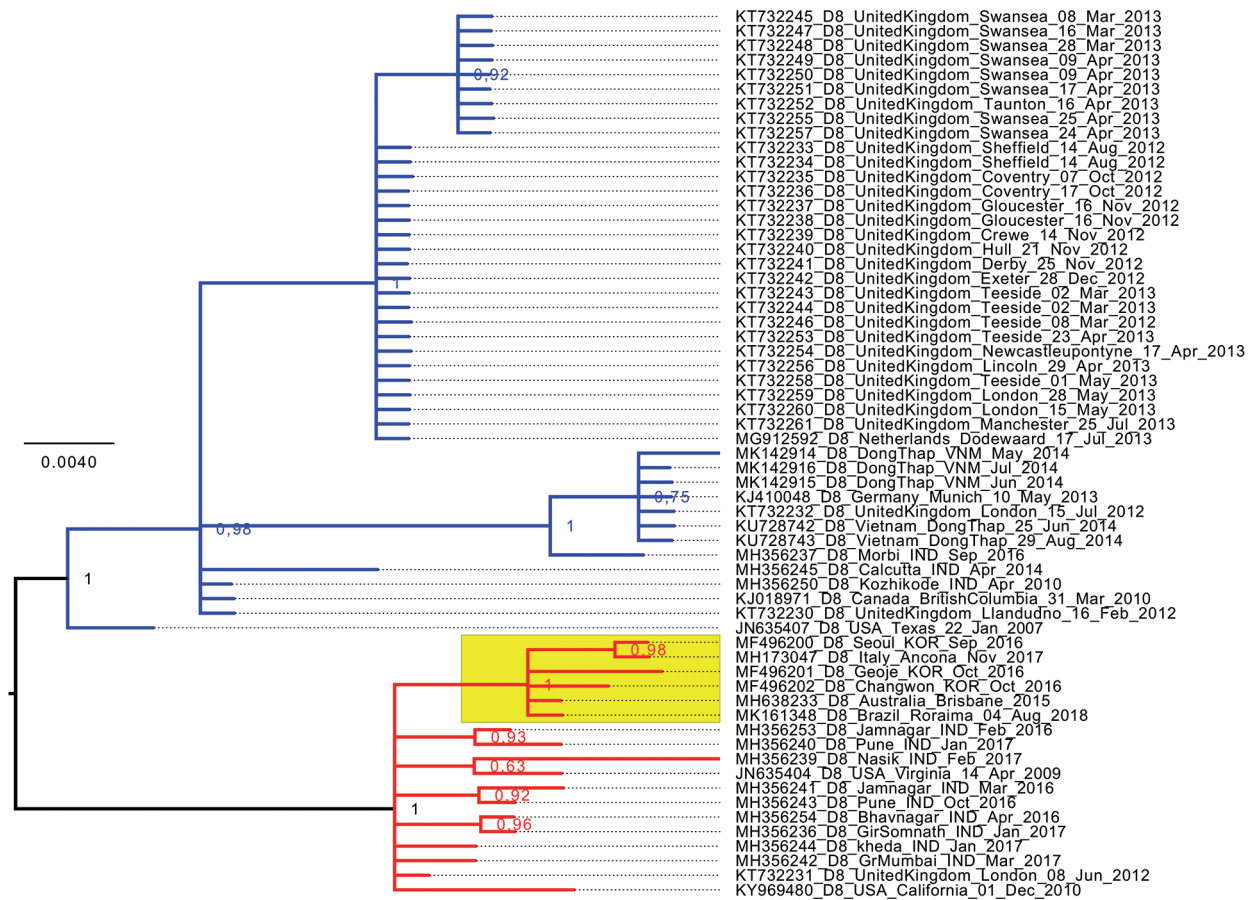

Fig. 3: phylogenetic tree of the measles virus based on the N gene. A mid-rooted tree with increasing node order was constructed using the MrBayes program (version 3.2.6). The same dataset used to analyse complete genomes (Figure) was employed for comparison. The scale bar represents nucleotide substitutions per site.

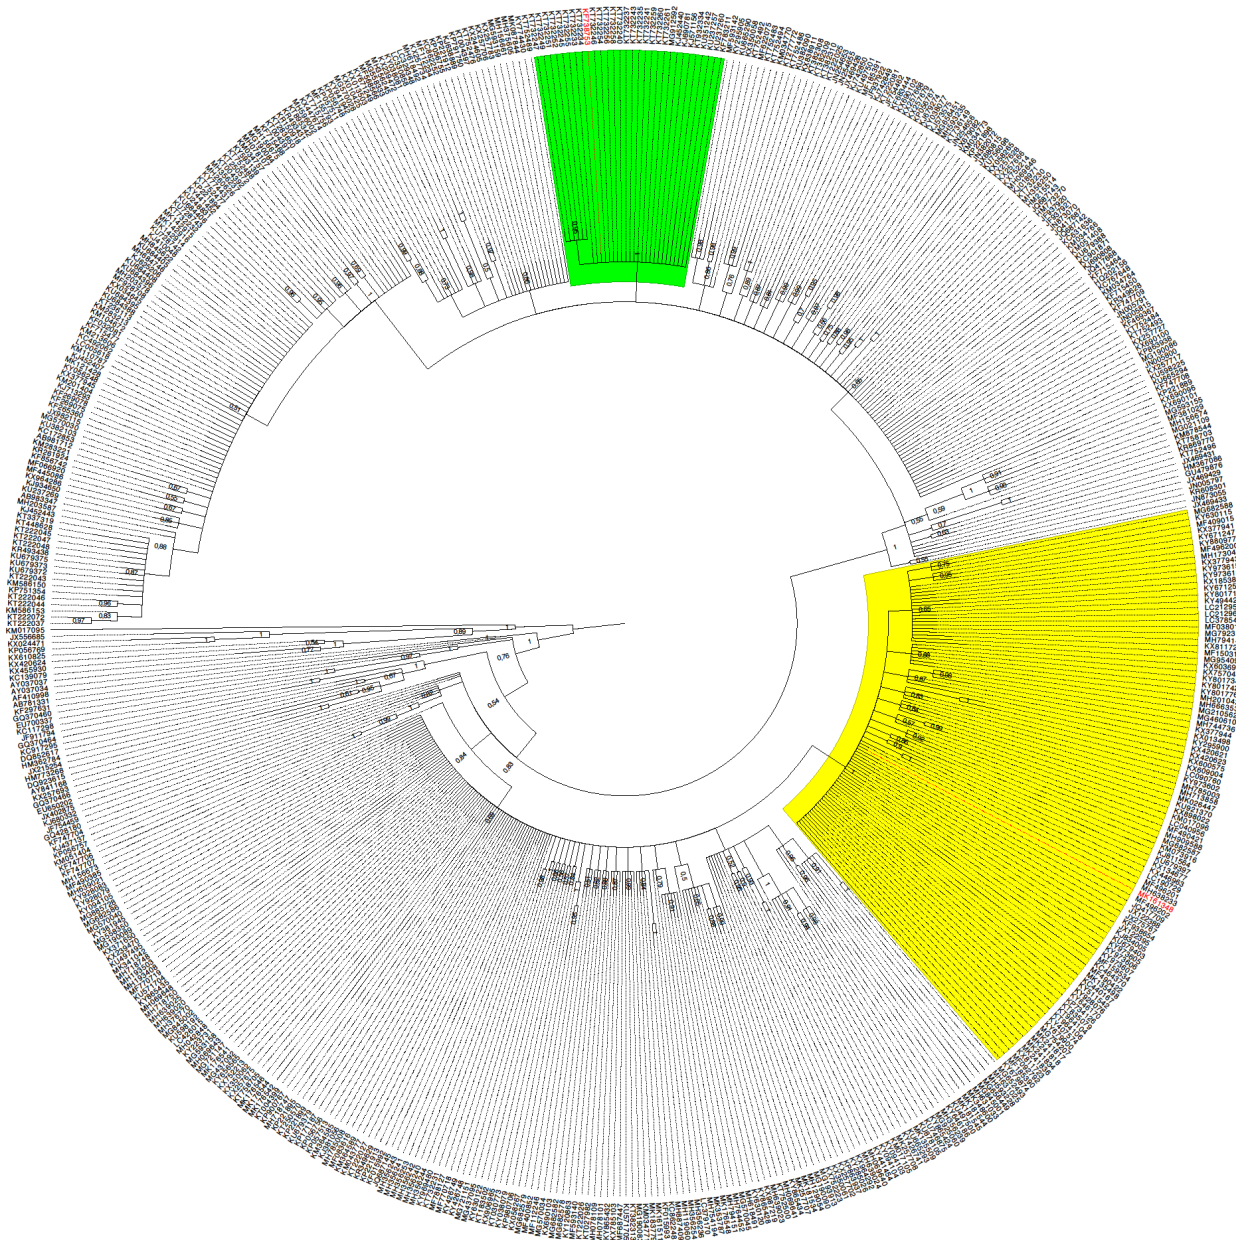

Fig. 4: phylogenetic tree of all measles genotype D8 sequences. A total of 567 non-redundant sequences, containing the 450 bp fragment of the N gene commonly used for genotyping, were used for phylogenetic reconstruction with the MrBayes program (version 3.2.6). A mid-rooted tree with increasing node order was edited with FigTree (version 1.4.3). Two clades containing sequences from Brazil are highlighted in green (GenBank accession number: KF738753, Pernambuco, 2013) and yellow (MK161348, Roraima, 2018), supporting at least two recent and different events of measles D8 introduction in Brazil since 2013.
